# Supplementary material
Source: PubMed Central journal article supplement (PMC2777460)
Supplement: suppfigs.pdf [file suppfigs.pdf]

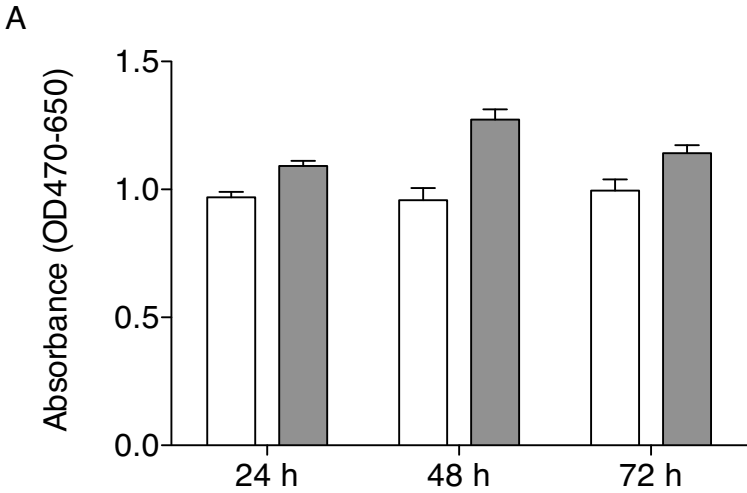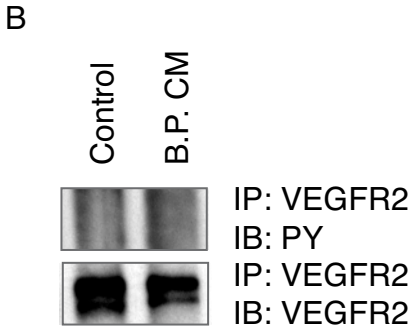

A

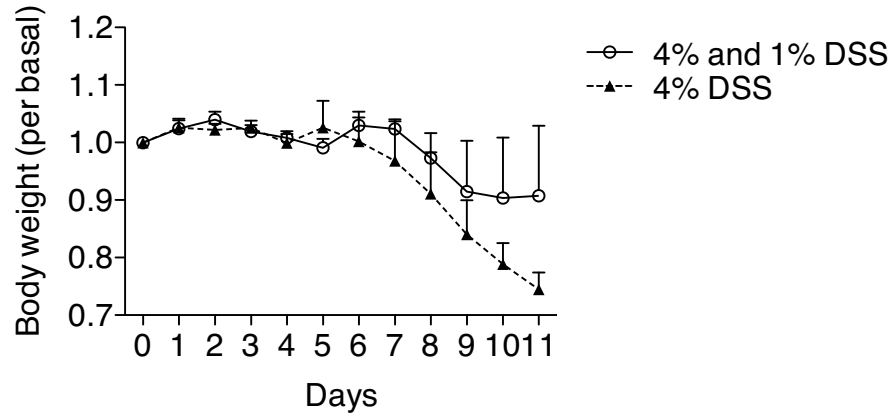

B

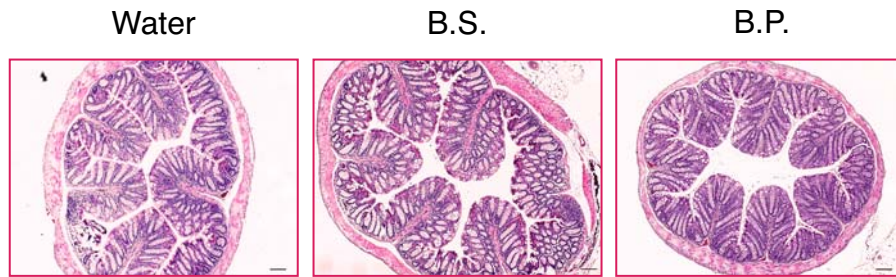

1 **Supplemental Materials and Methods**

2 *Antibodies*- Anti-VEGFR2 antibody was crude polyclonal rabbit antisera that were  
3 previously described (1). Anti-phosphotyrosine antibody PY20 was from BD  
4 transduction laboratory (San Diego, CA).

5 *XTT assay*-HIMECs were plated on a 96 well plate and incubated for 24-72 h in the  
6 presence or absence of B.P. CM. At the indicated times, XTT solution (Roche Applied  
7 Science, Mannheim, Germany) was added and incubated for additional 4 h. Colorimetic  
8 intensity was measured on a spectrophotometer (Spectra Max M5, Molecular Devices,  
9 Sunnyvale, CA).

10  
11 **Supplemental Figure Legends**

12 **Supplemental Figure S1. (A) B.P. CM barely increased endothelial cell proliferation.**  
13 HIMECs were incubated with B.P. CM for 24-72 h and subjected to a XTT assay to  
14 measure cell proliferation. (B) **B.P. CM did not induce the phosphorylation of**  
15 **VEGFR2.** HIMECs were treated with B.P. CM for 2 min. Total lysates were  
16 immunoprecipitated with anti-VEGFR2 antibody and then immunoblotted with anti-PY  
17 antibody.

18  
19 **Supplemental Figure S2. (A) Lowering the concentration of DSS to 1% increased**  
20 **body weight suggesting recovery of mice from colitis.** Two groups of CD1 mice were  
21 supplied with 4% DSS for a week and one group of mice were supplied with 1% DSS for  
22 additional 4 days whereas the other group of mice were continuously supplied with 4%  
23 DSS. Body weight was measure every morning throughout the experiment. (B) **Tissues**  
24 **from the mice fed with B.S. or B.P. alone showed intact mucosal layers.** Bar, 100  $\mu$ m.

25  
26 **Supplemental References**

27 1. **Im E and Kazlauskas A.** Regulating angiogenesis at the level of PtdIns-4,5-P2.  
28 *EMBO J* 25: 2075-2082, 2006.
